# Supplementary material for: Genome-wide identification of DUF506 gene family in Oryza sativa and expression profiling under abiotic stresses
Source: PeerJ. 2023 Sep 29;11:e16168. doi: 10.7717/peerj.16168 (PMC10544316; doi:10.7717/peerj.16168)
Supplement: Supplemental Information 1 [file peerj-11-16168-s001.xlsx]

## Sheet: Table S1
Table S1 The ID information of DUF506 genes in 10 plant species
	Species	Gene	Subfamily
Dicots	Arabidopsis thaliana	AT1G12030	I
		AT1G62420	I
		AT3G07350	I
		AT3G25240	I
		AT2G20670	II
		AT4G32480	II
		AT1G77145	IIIa
		AT1G77160	IIIa
		AT2G39650	IIIa
		AT2G38820	IIIb
		AT3G22970	IIIb
		AT3G54550	IIIb
		AT4G14620	IIIb
	Glycine max	KRH07392	I
		KRH11519	I
		KRH36535	I
		KRH46613	I
		KRH51155	I
		KRH10888	II
		KRH20449	II
		KRH21430	II
		KRH25596	II
		KRH25597	II
		KRH27801	II
		KRH50053	II
		KRH77753	II
		KRH01670	IIIa
		KRH70457	IIIa
		KRG92439	IIIb
		KRG95604	IIIb
		KRG95605	IIIb
		KRG95606	IIIb
		KRH31637	IIIb
		KRH32089	IIIb
		KRH34359	IIIb
		KRH69065	IIIb
		KRH71350	IIIb
		KRH71351	IIIb
	Solanum tuberosum	PGSC0003DMT400008686	I
		PGSC0003DMT400051812	I
		PGSC0003DMT400053173	I
		PGSC0003DMT400033381	II
		PGSC0003DMT400045914	II
		PGSC0003DMT400047228	II
		PGSC0003DMT400076440	II
		PGSC0003DMT400076441	II
		PGSC0003DMT400076442	II
		PGSC0003DMT400025041	IIIa
		PGSC0003DMT400015576	IIIb
		PGSC0003DMT400041951	IIIb
		PGSC0003DMT400049773	IIIb
	Gossypium raimondii	KJB08778	I
		KJB42568	I
		KJB68564	I
		KJB69193	I
		KJB84051	I
		KJB34862	II
		KJB34863	II
		KJB50110	II
		KJB68642	II
		KJB69527	II
		KJB81246	II
		KJB73924	IIIa
		KJB75241	IIIa
		KJB75242	IIIa
		KJB76091	IIIa
		KJB11130	IIIb
		KJB22953	IIIb
		KJB22954	IIIb
		KJB25958	IIIb
		KJB38255	IIIb
Monocots	Oryza sativa	LOC_Os01g68650	I
		LOC_Os11g25020	I
		LOC_Os11g25040	I
		LOC_Os01g54340	II
		LOC_Os05g44300	II
		LOC_Os01g74250	IIIa
		LOC_Os03g06680	IIIb
		LOC_Os03g58230	IIIb
		LOC_Os07g08390	IIIb
		LOC_Os10g28210	IIIb
	Zea mays	Zm00001eb143540	I
		Zm00001eb153020	II
		Zm00001eb139770	IIIa
		Zm00001eb004750	IIIb
		Zm00001eb047990	IIIb
		Zm00001eb060780	IIIb
		Zm00001eb116880	IIIb
		Zm00001eb301450	IIIb
	Hordeum vulgare	HORVU.MOREX.r3.1HG0077120	II
		HORVU.MOREX.r3.3HG0288470	II
		HORVU.MOREX.r3.3HG0307620	IIIa
		HORVU.MOREX.r3.3HG0329430	IIIa
	Triticum aestivum	TraesCS3B02G456400	I
		TraesCS4A02G116900	I
		TraesCS4B02G187500	I
		TraesCS4D02G188800	I
		TraesCS1A02G339700	II
		TraesCS1B02G352000	II
		TraesCS1D02G341700	II
		TraesCS3A02G274100	II
		TraesCS3B02G307800	II
		TraesCS3D02G273300	II
		TraesCS3A02G409700	IIIa
		TraesCS3A02G530700	IIIa
		TraesCS3B02G442800	IIIa
		TraesCS3B02G600900	IIIa
		TraesCS3D02G404300	IIIa
		TraesCS3D02G536200	IIIa
		TraesCS4A02G025500	IIIb
		TraesCS4B02G278500	IIIb
		TraesCS4D02G277000	IIIb
		TraesCS5A02G439200	IIIb
		TraesCS5B02G442200	IIIb
		TraesCS5D02G446400	IIIb
	Sorghum bicolor	EES04096	I
		EES01469	II
		EES19824	II
		EER91615	IIIb
		EER93295	IIIb
		EER95459	IIIb
		EER98072	IIIb
		OQU88571	IIIb
	Ananas comosus	Aco003129	I
		Aco021417	I
		Aco005614	II
		Aco006009	II
		Aco016807	IIIa
		Aco004226	IIIb
		Aco008831	IIIb

## Sheet: Table S2
Table S2 The Number of Cis-Acting Elements identified in OsDUF506s
functional categories	Cis-Acting Elements	OsDUF50601	OsDUF50602	OsDUF50603	OsDUF50604	OsDUF50605	OsDUF50606	OsDUF50607	OsDUF50608	OsDUF50609	OsDUF50610	Total
Hormone response	MeJA-responsiveness	4	6	2	16	4	2	8	6	4	6	58
	abscisic acid responsiveness	7	7	2	5	4	13	6	5		6	55
	auxin responsiveness		1	3				1	1	1		7
	salicylic acid responsiveness	1			2					4		7
	gibberellin responsiveness	2			1			1		1	1	6
abiotic stress response	light responsiveness	14	16	9	10	14	18	11	11	2	10	115
	anaerobic induction			2	2	6	1	3	3	2	2	21
	anoxic specific inducibility		4	1			1	1	2	2		11
	low-temperature responsiveness	1			1	1	1		1			5
	drought inducibility	1	1					1		1		4
	defense and stress responsiveness	2	1									3
plant growth and metabolism	MYBHv1 binding site	2		1	2	2	1	1				9
	meristem expression	1	1		2		1			1		6
	circadian control					1	1			1	1	4
	root specific	1				1	1					3
	zein metabolism regulation					2				1		3
	cell cycle regulation		1	1								2
	endosperm expression									1		1
	Flavonoid biosynthetic genes regulation					1						1
	Total	36	38	21	41	36	40	33	29	21	26	321

## Sheet: Table S3
Table S3 SNP-index values of OsDUF506s non-synonymous SNPs in 9 subpopulations
Subfamily	Gene ID	nsSNP ID	ind1A			ind1B			ind2			ind3			indx			japx			subtrop			temp			trop
			SNPGJ-index	SNPXI-index	SNPH-index	SNPGJ-index	SNPXI-index	SNPH-index	SNPGJ-index	SNPXI-index	SNPH-index	SNPGJ-index	SNPXI-index	SNPH-index	SNPGJ-index	SNPXI-index	SNPH-index	SNPGJ-index	SNPXI-index	SNPH-index	SNPGJ-index	SNPXI-index	SNPH-index	SNPGJ-index	SNPXI-index	SNPH-index	SNPGJ-index	SNPXI-index	SNPH-index
I	OSDUF50602	OSDUF50602.1	1.06383	98.9362	0	2.54777	97.4522	0	3.67647	95.9559	0.367647	24.0535	73.9421	2.00445	13.5397	82.7853	3.67505	87.6712	10.9589	1.36986	85.8491	14.1509	0	99.2095	0.395257	0.395257	97.7077	1.7192	0.573066
	OsDUF50609	OsDUF50609.1	1.94175	96.6019	1.45631	0	99.5025	0.497512	0.714286	98.5714	0.714286	0.431034	98.9224	0.646552	2.01342	95.8054	2.18121	88.75	6.25	5	100	0	0	97.8723	1.77305	0.35461	95.5801	3.8674	0.552486
		OsDUF50609.2	100	0	0	100	0	0	100	0	0	100	0	0	100	0	0	70.7317	25.6098	3.65854	100	0	0	84.5614	15.4386	0	99.729	0.271003	0
		OsDUF50609.3	98.5646	1.43541	0	100	0	0	99.6479	0.352113	0	99.7895	0.210526	0	98.8525	1.14754	0	97.561	2.43902	0	99.1071	0.892857	0	99.3007	0.699301	0	100	0	0
		OsDUF50609.4	98.5577	1.44231	0	100	0	0	99.6479	0.352113	0	99.789	0.21097	0	98.5246	1.31148	0.163934	97.5309	2.46914	0	99.0991	0.900901	0	99.2982	0.701754	0	99.4609	0.539084	0
		OsDUF50609.5	98.5646	1.43541	0	100	0	0	99.6479	0.352113	0	99.7886	0.211416	0	98.8562	1.14379	0	97.5904	2.40964	0	99.0991	0.900901	0	99.3031	0.696864	0	100	0	0
		OsDUF50609.6	0.985646	99.0144	0	1	99	0	0.996491	99.0035	0	0.997886	99.0021	0	0.988543	99.0115	0	0.975904	99.0241	0	0.990991	99.009	0	0.993007	99.007	0	1	99	0
		OsDUF50609.7	0.497512	99.005	0.497512	0	99.4975	0.502513	0.353357	98.9399	0.706714	0.21645	99.3506	0.4329	0.668896	97.6589	1.67224	85.5422	10.8434	3.61446	99.0826	0.917431	0	97.491	2.50896	0	94.5055	4.3956	1.0989
		OsDUF50609.8	98.5437	1.45631	0	100	0	0	99.6466	0.353357	0	99.7868	0.21322	0	98.8353	1.16473	0	97.561	2.43902	0	99.0826	0.917431	0	99.2908	0.70922	0	100	0	0
		OsDUF50609.9	79.7872	18.617	1.59574	99.3865	0.613497	0	40.3636	58.5455	1.09091	92.0177	7.5388	0.443459	83.0855	15.0558	1.85874	96.0526	3.94737	0	100	0	0	100	0	0	98.8406	0.869565	0.289855
		OsDUF50609.10	100	0	0	99.2308	0.769231	0	100	0	0	85.3147	14.2191	0.4662	99.3852	0.614754	0	100	0	0	100	0	0	100	0	0	99.6894	0	0.310559
		OsDUF50609.11	99.3789	0.621118	0	100	0	0	99.6154	0.384615	0	99.7685	0.231481	0	99.3492	0.650759	0	100	0	0	100	0	0	100	0	0	100	0	0
		OsDUF50609.12	98.5149	1.48515	0	100	0	0	99.6403	0.359712	0	99.7817	0.218341	0	98.4642	1.36519	0.170648	97.4684	2.53165	0	99.0566	0.943396	0	99.639	0.361011	0	99.4413	0.558659	0
		OsDUF50609.13	99.5146	0.485437	0	100	0	0	99.6454	0.35461	0	99.7881	0.211864	0	99.3443	0.491803	0.163934	100	0	0	100	0	0	100	0	0	99.455	0.544959	0
	OsDUF50610	OsDUF50610.1	100	0	0	99.0196	0.490196	0.490196	100	0	0	83.9323	15.4334	0.634249	99.5074	0.492611	0	100	0	0	100	0	0	100	0	0	99.7312	0	0.268817
		OsDUF50610.2	100	0	0	100	0	0	100	0	0	100	0	0	100	0	0	91.5663	8.43373	0	100	0	0	99.3007	0.699301	0	90.8602	8.60215	0.537634
		OsDUF50610.3	98.5577	1.44231	0	100	0	0	99.6491	0.350877	0	99.7895	0.210526	0	98.5294	1.14379	0.326797	97.5904	2.40964	0	99.1071	0.892857	0	99.3031	0.696864	0	99.4609	0.539084	0
		OsDUF50610.4	98.5646	1.43541	0	100	0	0	99.6479	0.352113	0	99.789	0.21097	0	98.3713	1.14007	0.488599	97.5904	2.40964	0	99.1071	0.892857	0	99.3007	0.699301	0	99.4624	0.537634	0
		OsDUF50610.5	91.2195	8.29268	0.487805	95.098	4.41176	0.490196	100	0	0	100	0	0	93.4747	5.54649	0.978793	97.561	1.21951	1.21951	100	0	0	98.2578	1.39373	0.348432	99.1892	0.810811	0
		OsDUF50610.6	0.480769	98.5577	0.961538	0	100	0	0.353357	98.9399	0.706714	0.212766	99.1489	0.638298	0.662252	97.351	1.98675	85.1852	9.87654	4.93827	99.0991	0.900901	0	96.7509	2.88809	0.361011	95.0549	4.3956	0.549451
II	OsDUF50606	OsDUF50606.1	100	0	0	80.8081	17.6768	1.51515	99.6466	0.353357	0	99.7877	0	0.212314	95.6882	3.48259	0.829187	67.0886	30.3797	2.53165	94.6429	5.35714	0	90.7473	8.8968	0.355872	21.1699	75.4875	3.34262
	OSDUF50601	OSDUF50601.1	100	0	0	99.5122	0.487805	0	99.2958	0.352113	0.352113	100	0	0	100	0	0	100	0	0	100	0	0	100	0	0	100	0	0
IIIa	OSDUF50603	OSDUF50603.1	99.5146	0.485437	0	24.7525	72.2772	2.9703	83.5714	15.7143	0.714286	79.4492	19.2797	1.27119	74.0132	22.8618	3.125	95.122	2.43902	2.43902	100	0	0	98.5816	0.70922	0.70922	97.019	2.71003	0.271003
		OSDUF50603.2	4.85437	92.233	2.91262	75.9804	22.0588	1.96078	70.1068	27.4021	2.4911	35.8051	61.4407	2.75424	45.2303	50.1645	4.60526	96.3855	0	3.61446	100	0	0	99.6429	0.357143	0	99.1935	0.268817	0.537634
IIIb	OsDUF50608	OsDUF50608.1	100	0	0	100	0	0	100	0	0	100	0	0	100	0	0	97.5904	1.20482	1.20482	100	0	0	100	0	0	90.137	9.58904	0.273973
		OsDUF50608.2	30.102	67.8571	2.04082	3.04569	94.4162	2.53807	10.4089	88.8476	0.743494	0	98.6547	1.34529	6.1082	90.7504	3.14136	96.3415	1.21951	2.43902	99.1071	0.892857	0	99.2908	0.35461	0.35461	98.9071	0.819672	0.273224
		OsDUF50608.3	70.6731	28.8462	0.480769	98.5294	1.47059	0	89.3617	10.6383	0	100	0	0	94.599	4.41899	0.981997	97.5904	1.20482	1.20482	100	0	0	100	0	0	99.7305	0	0.269542
	OsDUF50604	OsDUF50604.1	99.5192	0	0.480769	100	0	0	100	0	0	100	0	0	100	0	0	98.7805	1.21951	0	100	0	0	99.6503	0.34965	0	88.172	11.2903	0.537634
	OsDUF50607	OsDUF50607.1	0.578035	94.7977	4.62428	1.98675	97.351	0.662252	3.25203	93.9024	2.84553	0.25974	97.6623	2.07792	3.9501	93.5551	2.4948	97.5309	1.23457	1.23457	100	0	0	100	0	0	99.446	0.277008	0.277008
	OsDUF50605	OsDUF50605.1	99.5215	0	0.478469	99.0244	0.97561	0	96.4664	3.18021	0.353357	100	0	0	98.3713	1.14007	0.488599	100	0	0	100	0	0	100	0	0	99.7312	0	0.268817

## Sheet: Table S4
Table S4 The Ka/Ks ratios in duplicated gene pairs identified in OsDUF506s
No.	Sequence	Duplication Type	Ka	Ks	Ka/Ks	Date (Millions of Years Ago)	Type of Selection
1	OsDUF50609/OsDUF50610	Tandem	0.499917	1.06819	0.468005	58.6916	Purifying
2	OsDUF50601/OsDUF50606	Segmental	0.172234	0.372662	0.462171	20.476	Purifying
3	OsDUF50604/OsDUF50608	Segmental	0.13816	0.506012	0.273037	27.8028	Purifying
4	OsDUF50605/OsDUF50607	Segmental	0.230249	0.463602	0.496652	25.4727	Purifying

## Sheet: Table S5
Table S5 One-to-one orthologous relationships between rice and other monocotyledonous species
Species	chromosome	Gene ID	Species	chromosome	Gene ID
Oryza sativa	3	OsDUF50605	Arabidopsis thaliana	3	AT3G22970
	3	OsDUF50604		3	AT3G22970
	3	OsDUF50604		4	AT4G14620
	7	OsDUF50607		3	AT3G22970
	7	OsDUF50607		4	AT4G14620
	10	OsDUF50608		3	AT3G22970
Oryza sativa	1	OsDUF50601	Zea mays	3	Zm00001eb153020
	1	OsDUF50602		3	Zm00001eb143540
	2	OsDUF50603		3	Zm00001eb139770
	3	OsDUF50605		1	Zm00001eb060780
	4	OsDUF50604		1	Zm00001eb004750
	5	OsDUF50605		2	Zm00001eb116880
	6	OsDUF50605		7	Zm00001eb301450
	5	OsDUF50606		3	Zm00001eb153020
	7	OsDUF50607		1	Zm00001eb060780
	8	OsDUF50607		7	Zm00001eb301450
	10	OsDUF50608		1	Zm00001eb004750
Oryza sativa	1	OsDUF50601	Hordeum vulgare	1	HORVU.MOREX.r3HG0077120
	1	OsDUF50601		3	HORVU.MOREX.r3.3HG0288470
	1	OsDUF50602		3	HORVU.MOREX.r3.3HG0309470
	1	OsDUF50603		3	HORVU.MOREX.r3.3HG0329430
	3	OsDUF50604		4	HORVU.MOREX.r3.4HG0402310
	3	OsDUF50605		5	HORVU.MOREX.r3.5HG0519200
	5	OsDUF50606		1	HORVU.MOREX.r3HG0077120
	5	OsDUF50606		3	HORVU.MOREX.r3.3HG0288470
	7	OsDUF50607		5	HORVU.MOREX.r3.5HG0519200
	10	OsDUF50608		4	HORVU.MOREX.r3.4HG0402310
Oryza sativa	1	OsDUF50601	Triticum aestivum	1A	TraesCS1A02G339700
	1	OsDUF50601		1B	TraesCS1B02G352000
	1	OsDUF50601		1D	TraesCS1D02G341700
	1	OsDUF50602		3A	TraesCS3A02G420900
	1	OsDUF50603		3A	TraesCS3A02G530700
	1	OsDUF50601		3A	TraesCS3A02G274100
	1	OsDUF50602		3B	TraesCS3B02G456400
	1	OsDUF50603		3B	TraesCS3B02G600900
	1	OsDUF50601		3B	TraesCS3B02G307800
	1	OsDUF50602		3D	TraesCS3D02G416400
	1	OsDUF50603		3D	TraesCS3D02G536200
	1	OsDUF50601		3D	TraesCS3D02G273300
	3	OsDUF50604		4A	TraesCS4A02G025500
	3	OsDUF50604		4B	TraesCS4B02G278500
	3	OsDUF50604		4D	TraesCS4D02G277000
	3	OsDUF50605		5A	TraesCS5A02G439200
	3	OsDUF50605		5B	TraesCS5B02G442200
	3	OsDUF50605		5D	TraesCS5D02G446400
	5	OsDUF50606		1A	TraesCS1A02G339700
	5	OsDUF50606		1B	TraesCS1B02G352000
	5	OsDUF50606		1D	TraesCS1D02G341700
	5	OsDUF50606		3A	TraesCS3A02G274100
	5	OsDUF50606		3B	TraesCS3B02G307800
	5	OsDUF50606		3D	TraesCS3D02G273300
	7	OsDUF50607		5A	TraesCS5A02G439200
	7	OsDUF50607		5B	TraesCS5B02G442200
	7	OsDUF50607		5D	TraesCS5D02G446400
	10	OsDUF50608		4A	TraesCS4A02G025500
	10	OsDUF50608		4B	TraesCS4B02G278500
	10	OsDUF50608		4D	TraesCS4D02G277000
Oryza sativa	1	OsDUF50601	Sorghum bicolor	3	EES01469
	1	OsDUF50602		3	EES04096
	1	OsDUF50601		9	EES19824
	3	OsDUF50604		1	EER91615
	3	OsDUF50605		1	EER93295
	3	OsDUF50604		1	EER95459
	5	OsDUF50606		3	EES01469
	5	OsDUF50606		9	EES19824
	7	OsDUF50607		1	EER93295
	10	OsDUF50608		1	EER95459
	10	OsDUF50608		1	EER91615
Oryza sativa	1	OsDUF50602	Ananas comosus	1	Aco017350.1
	1	OsDUF50603		4	Aco016807.1
	1	OsDUF50601		11	Aco005614.1
	1	OsDUF50601		16	Aco006009.1
	3	OsDUF50605		9	Aco008831.1
	3	OsDUF50604		9	Aco008831.1
	3	OsDUF50604		15	Aco004226.1
	3	OsDUF50605		15	Aco004226.1
	5	OsDUF50606		11	Aco005614.1
	5	OsDUF50606		16	Aco006009.1
	7	OsDUF50607		9	Aco008831.1
	10	OsDUF50608		15	Aco004226.1

## Sheet: Table S6
Table S6 The Predicted miRNAs targeting OsDUF506s
miRNA_Acc.	Target_Acc.	Expectation	miRNA_start	miRNA_end	Target_start	Target_end	Inhibition	Multiplicity
osa-miR6249a	OsDUF50602	2	1	21	826	846	Cleavage	1
osa-miR6249b	OsDUF50602	2	1	21	826	846	Cleavage	1
osa-miR2094-3p	OsDUF50609	3.5	1	22	132	153	Cleavage	1
osa-miR2927	OsDUF50608	3.5	1	23	264	286	Cleavage	1
osa-miR5075	OsDUF50607	3.5	1	21	121	141	Cleavage	1
osa-miR1848	OsDUF50602	4	1	21	547	567	Cleavage	2
osa-miR1848	OsDUF50607	4	1	21	49	69	Cleavage	1
osa-miR2925	OsDUF50602	4	1	19	787	805	Cleavage	1
osa-miR5075	OsDUF50604	4	1	21	3	23	Cleavage	2
osa-miR5833	OsDUF50610	4	1	21	573	593	Cleavage	1
osa-miR815a	OsDUF50603	4	1	21	640	660	Cleavage	1
osa-miR815b	OsDUF50603	4	1	21	640	660	Cleavage	1
osa-miR815c	OsDUF50603	4	1	21	640	660	Cleavage	1
osa-miR160f-3p	OsDUF50609	4.5	1	21	30	50	Cleavage	1
osa-miR168b	OsDUF50601	4.5	1	21	161	181	Cleavage	1
osa-miR2864.1	OsDUF50602	4.5	1	21	170	190	Cleavage	1
osa-miR2864.1	OsDUF50607	4.5	1	21	467	487	Cleavage	1
osa-miR2880	OsDUF50603	4.5	1	24	903	926	Translation	1
osa-miR2924	OsDUF50608	4.5	1	21	406	425	Cleavage	1
osa-miR2925	OsDUF50605	4.5	1	19	1195	1213	Cleavage	2
osa-miR2926	OsDUF50607	4.5	1	20	505	524	Translation	1
osa-miR5075	OsDUF50604	4.5	1	21	96	116	Translation	2
osa-miR531a	OsDUF50607	4.5	1	24	46	68	Cleavage	1
osa-miR531b	OsDUF50607	4.5	1	20	50	68	Cleavage	1
osa-miR531c	OsDUF50607	4.5	1	24	46	68	Cleavage	1
osa-miR5340	OsDUF50603	4.5	1	23	534	556	Translation	1
osa-miR5833	OsDUF50603	4.5	1	21	136	156	Cleavage	1
osa-miR1427	OsDUF50602	5	1	21	29	49	Cleavage	1
osa-miR156j-3p	OsDUF50610	5	1	22	94	115	Translation	1
osa-miR162b	OsDUF50604	5	1	21	63	83	Cleavage	1
osa-miR167e-3p	OsDUF50603	5	1	21	715	735	Cleavage	1
osa-miR167i-3p	OsDUF50603	5	1	21	715	735	Cleavage	1
osa-miR171d-5p	OsDUF50606	5	1	21	34	55	Cleavage	1
osa-miR1846a-5p	OsDUF50604	5	1	21	709	729	Cleavage	1
osa-miR1846a-5p	OsDUF50608	5	1	21	694	714	Cleavage	1
osa-miR1846b-5p	OsDUF50604	5	1	21	709	729	Cleavage	1
osa-miR1846b-5p	OsDUF50608	5	1	21	694	714	Cleavage	1
osa-miR1846c-5p	OsDUF50604	5	1	21	709	729	Cleavage	1
osa-miR1846c-5p	OsDUF50608	5	1	21	694	714	Cleavage	1
osa-miR1846d-3p	OsDUF50606	5	1	20	559	578	Cleavage	1
osa-miR1848	OsDUF50602	5	1	21	472	492	Cleavage	2
osa-miR1848	OsDUF50605	5	1	21	95	114	Cleavage	1
osa-miR1848	OsDUF50606	5	1	21	280	300	Cleavage	1
osa-miR1874-3p	OsDUF50605	5	1	24	846	869	Cleavage	1
osa-miR1875	OsDUF50605	5	1	24	848	871	Translation	1
osa-miR2102-5p	OsDUF50609	5	1	20	310	329	Cleavage	1
osa-miR2919	OsDUF50603	5	1	19	748	766	Cleavage	1
osa-miR2925	OsDUF50605	5	1	19	283	301	Cleavage	2
osa-miR2925	OsDUF50608	5	1	19	1	19	Cleavage	1
osa-miR2927	OsDUF50601	5	1	23	105	127	Cleavage	1
osa-miR2927	OsDUF50604	5	1	23	270	292	Cleavage	1
osa-miR2927	OsDUF50609	5	1	23	584	606	Cleavage	1
osa-miR2927	OsDUF50605	5	1	23	956	978	Cleavage	1
osa-miR2927	OsDUF50602	5	1	23	192	214	Cleavage	1
osa-miR2927	OsDUF50606	5	1	23	114	136	Cleavage	1
osa-miR444b.1	OsDUF50606	5	1	21	541	561	Translation	1
osa-miR444c.1	OsDUF50606	5	1	21	541	561	Translation	1
osa-miR5075	OsDUF50602	5	1	21	309	329	Cleavage	1
osa-miR5075	OsDUF50610	5	1	21	678	698	Cleavage	1
osa-miR5078	OsDUF50605	5	1	21	716	736	Cleavage	1
osa-miR5340	OsDUF50610	5	1	23	495	517	Translation	1
osa-miR5809	OsDUF50603	5	1	20	27	46	Cleavage	1
osa-miR5809	OsDUF50604	5	1	20	877	896	Cleavage	1
osa-miR5809	OsDUF50606	5	1	20	112	131	Cleavage	2
osa-miR5809	OsDUF50606	5	1	20	819	838	Cleavage	2
osa-miR5816	OsDUF50602	5	1	24	106	129	Cleavage	1
osa-miR5821	OsDUF50602	5	1	21	658	678	Cleavage	1
osa-miR5832	OsDUF50601	5	1	21	114	134	Translation	1
osa-miR5837.2	OsDUF50610	5	1	21	615	635	Cleavage	1

## Sheet: Table S7
Table S7 The expression data of OsDUF506s in different tissues
Gene ID	Leaf blade			Leaf sheath		Root		Stem		Inflorescence		Anther		Pistil		Lemma		Palea		Ovary		Embryo		Endosperm
	vegetative	reproductive	ripening	vegetative	reproductive	vegetative	reproductive	reproductive	ripening	0.6-1.0mm	5.0-10.0mm	0.3-0.6mm	1.6-2.0mm	5-10cm	14-18cm	1.5-2.0mm	7mm	1.5-2.0mm	7mm	01 DAF	07 DAF	07 DAF	42 DAF	07 DAF	42 DAF
OsDUF50601	2.695	0.5249	-0.07466	0.9419	0.1872	0.239	0.2893	-0.1187	2.081	1.659	1.265	2.14	-0.0321	2.07	0.9599	0.7287	2.724	0.24	2.594	-1.507	-0.765	-1.402	-3.673	-0.9007	-1.538
OsDUF50602	-2.666	-4.338	-7.21	0.7576	-1.094	1.208	-0.765	-2.928	0.7329	1.178	0.6785	0.7951	1.372	1.039	0.7338	-0.9762	-0.3026	-1.141	-0.3435	-1.382	2.582	3.635	-0.1735	3.088	-1.832
OsDUF50603	0.4872	-0.7082	-0.8608	-1.153	-0.7149	-1.972	-2.19	-1.842	-1.497	-2.198	-2.163	-1.332	-1.229	-1.612	-1.887	-1.845	-1.345	-1.705	-1.454	-1.106	-1.943	-2.5	-1.43	-2.015	-0.3811
OsDUF50604	-0.6665	-0.9374	-2.851	0.3759	0.5977	0.6965	-0.0388	0.8398	2.279	1.702	2.521	1.564	3.811	1.75	2.279	1.141	1.92	0.7955	1.973	-0.2354	0.5405	-0.3855	-0.1409	0.2796	-0.9176
OsDUF50605	3.553	1.294	-0.1237	1.652	3	0.251	1.409	-0.8011	0.4521	1.189	2.035	2.245	1.97	2.182	1.817	2.188	0.5525	2.083	0.6753	-1.019	-0.543	-0.5565	0.3458	-2.295	1.635
OsDUF50606	-3.272	-3.126	-3.888	-4.695	-6.162	-5.226	-4.805	-7.692	-2.785	-5.49	-5.309	-4.986	-4.342	-7.268	-6.876	-8.658	-2.65	-8.307	-1.957	-9.057	-9.48	-9.915	-7.404	-8.04	-7.444
OsDUF50607	-2.935	-0.4138	-1.203	0.01167	2.637	1.898	2.329	-1.513	1.349	0.1393	-0.8793	0.944	1.917	0.6534	0.4736	-2.126	0.5808	-2.352	0.8423	0.3954	2.481	0.3366	-2.691	2.077	-0.6557
OsDUF50608	0.5285	1.375	0.3222	0.6157	2.702	1.45	2.226	0.5195	2.159	2.215	1.211	0.3878	0.1372	0.2535	-0.0212	-1.051	2.497	-1.274	2.403	-0.3452	-0.3045	-1.619	-1.635	-0.4268	-0.1783
OsDUF50609	NA	NA	NA	NA	NA	NA	NA	NA	NA	NA	NA	NA	NA	NA	NA	NA	NA	NA	NA	NA	NA	NA	NA	NA	NA
OsDUF50610	-8.614	-8.584	-4.722	-8.684	-3.746	-6.215	-5.755	-7.86	-9.242	-8.861	-9.338	-7.79	-8.22	-10.57	-10.49	-8.397	-9.968	-8.355	-9.613	-9.309	-9.277	-6.404	-7.228	-7.607	-6.979
Note:NA represents miss data.

## Sheet: Table S8
Table S8 The expression data of OsDUF506s induced by plant hormones
	root																								shoot
Hormones	ABA				GA3				IAA				JA				BL				tZ				ABA					GA3					IAA					JA					BL
GeneID	0 hr	1 hr	3 hr	6 hr	0 hr	1 hr	3 hr	6 hr	0 hr	1 hr	3 hr	6 hr	0 hr	1 hr	3 hr	6 hr	0 hr	1 hr	3 hr	6 hr	0 hr	1 hr	3 hr	6 hr	0 hr	1 hr	3 hr	6 hr	12 hr	0 hr	1 hr	3 hr	6 hr	12 hr	0 hr	1 hr	3 hr	6 hr	12 hr	0 hr	1 hr	3 hr	6 hr	12 hr	0 hr	1 hr	3 hr	6 hr	12 hr
OsDUF50601	-0.25404	0.019873	0.665	0.6178	-0.25404	-0.47242	-0.06228	0.16491	-0.25404	-0.52115	0.23743	0.081561	-0.25404	-0.027907	1.871	1	-0.25404	-0.12872	0.47847	0.18844	-0.25404	-0.63001	-0.14292	0.45789	-0.16066	0.22853	0.37235	0.94873	1.1451	-0.16066	-0.16867	-0.3039	-0.19465	-0.11866	-0.16066	-0.51181	0.26805	0.14988	-0.073663	-0.16066	1.2945	0.42155	0.47569	0.87767	-0.16066	-0.21011	0.34774	-0.10626	-0.45798
OsDUF50602	-0.031546	1.4226	2.2226	0.86239	-0.031546	-0.28853	-0.10152	0.0085252	-0.031546	-0.21721	0.17002	0.17787	-0.031546	1.6449	1.352	1.8543	-0.031546	-0.18282	0.0054004	-0.14445	-0.031546	0.48921	0.56958	0.48162	-0.060166	2.2597	3.1018	3.1143	3.4077	-0.060166	0.15226	0.0031301	0.11519	0.19648	-0.060166	-0.37418	1.407	0.24537	0.037083	-0.060166	1.5714	1.6207	1.5046	1.7435	-0.060166	-0.40151	0.11949	-0.0415	0.13645
OsDUF50603	0.2255	0.33002	0.61118	0.48561	0.2255	-0.13765	-0.086108	0.025401	0.2255	0.2854	0.08814	0.28675	0.2255	0.37784	0.88836	1.3859	0.2255	0.37335	0.30034	0.59638	0.2255	0.12245	-0.16141	-0.014542	0.14768	-0.25325	-0.42198	-0.54816	-0.43903	0.14768	0.0034354	-0.0096319	0.068978	-0.073924	0.14768	0.13187	-0.37865	-0.39354	-0.13631	0.14768	0.51625	0.095457	-0.10694	0.19907	0.14768	0.14132	0.018954	-0.10464	0.16288
OsDUF50604	0.1287	-1.1882	-2.1911	-2.0594	0.1287	-0.058893	-0.18878	0.0032192	0.1287	-1.7046	-0.92291	-0.93498	0.1287	-2.1829	-1.6328	-2.2242	0.1287	0.42356	0.51969	0.32719	0.1287	0.58946	0.7635	0.72453	0.090156	-0.11219	-0.29138	-0.15353	0.0056649	0.090156	0.24797	0.019283	0.11522	-0.14594	0.090156	0.38919	-0.48904	0.38995	0.17364	0.090156	-0.81836	-0.77777	-0.55639	-0.21308	0.090156	0.09726	0.29203	0.2644	0.092121
OsDUF50605	-0.03099	1.4288	1.3544	1.1795	-0.03099	0.29553	0.27341	0.2321	-0.03099	-0.65062	-1.0856	-0.37182	-0.03099	-3.4696	-1.9621	-2.2312	-0.03099	-0.51042	-0.46191	-0.52136	-0.03099	-0.28075	0.15898	0.84937	-0.041598	-0.66035	-0.69642	-0.39366	0.082622	-0.041598	0.077751	-0.21058	-0.14363	0.13257	-0.041598	0.0065007	0.47043	-0.090003	-0.92886	-0.041598	-0.023613	-0.99738	-0.9901	-0.74334	-0.041598	0.15506	-0.075231	0.0053026	-0.085427
OsDUF50606	0.67554	0.87409	1.8751	0.15741	0.67554	0.0049905	-0.23211	-0.0018384	0.67554	-0.51325	-0.57301	0.4423	0.67554	-1.1761	0.71199	-0.84379	0.67554	-0.10973	0.61907	0.30841	0.67554	-1.0784	-1.0988	-0.91096	-0.078082	-0.23953	0.13203	0.089937	0.44693	-0.078082	0.15111	-0.214	0.14076	0.10908	-0.078082	-0.19122	-0.034266	0.74155	-0.4457	-0.078082	0.91194	-0.48013	-1.1712	1.095	-0.078082	-0.018634	0.35318	0.28082	-0.069958
OsDUF50607	0.090799	-0.33025	-1.2571	-1.3211	0.090799	0.3215	0.21198	0.033593	0.090799	-1.4499	-1.786	-0.23636	0.090799	-3.0215	-1.1357	-2.1925	0.090799	-0.39088	-0.60339	-0.40739	0.090799	-1.3717	-1.2128	-0.98286	-0.12872	0.36504	1.4657	1.7312	1.7054	-0.12872	-0.18133	-0.17069	-0.13178	0.019582	-0.12872	0.02242	0.79002	0.58542	0.1279	-0.12872	-1.0548	0.20345	0.63066	0.60855	-0.12872	-0.096385	0.0044253	0.20367	0.36013
OsDUF50608	0.052333	-0.92741	-1.5075	-1.3672	0.052333	0.20823	0.25158	0.16622	0.052333	-0.61404	-0.48865	-0.35166	0.052333	-1.6689	-1.1208	-2.0896	0.052333	0.36085	0.31142	0.42746	0.052333	-0.39141	-0.28794	-0.3874	0.044262	-0.5508	-0.51674	-0.58499	0.092481	0.044262	0.086692	-0.14638	0.061863	-0.037357	0.044262	0.10359	-0.30719	-0.080402	-0.39606	0.044262	-1.0786	-0.97462	-0.57133	-0.10126	0.044262	-0.00065001	0.021316	-0.10666	-0.19804
OsDUF50609	NA	NA	NA	NA	NA	NA	NA	NA	NA	NA	NA	NA	NA	NA	NA	NA	NA	NA	NA	NA	NA	NA	NA	NA	NA	NA	NA	NA	NA	NA	NA	NA	NA	NA	NA	NA	NA	NA	NA	NA	NA	NA	NA	NA	NA	NA	NA	NA	NA
OsDUF50610	0.47852	-0.47836	-2.1558	-1.8563	0.47852	0.60307	0.097265	1.4787	0.47852	-0.50823	-1.1155	0.27765	0.47852	-0.57225	-0.66321	1.2564	0.47852	-0.42246	-0.14111	-0.52061	0.47852	-0.41114	-0.52598	-0.54804	-0.54837	0.046361	-1.5716	-0.0049868	-0.52308	-0.54837	-0.049636	0.41749	1.184	1.0234	-0.54837	-2.2323	0.56258	-0.78135	0.53647	-0.54837	-1.4348	-1.4675	-1.2485	-1.0914	-0.54837	-2.1378	0.28103	-1.0429	-0.026921
Note:NA represents miss data.
[truncated: 5 more columns]

## Sheet: Table S9
Table S9 Primer sequences of OsDUF506s
Gene ID	Gene Locus	Forward (5'-3')	Reverse (5'-3')
OsDUF50601	LOC_Os01g54340	GTGCCTCTGTGTGGTCTAGG	AGAGACAGTGACGGGTTCCT
OsDUF50602	LOC_Os01g68650	AGACTCGGCGATGAAACATCA	AGTTGAAAGGAACTCTCGCTCT
OsDUF50603	LOC_Os01g74250	GAAGCTCTTGAGATATTCGGGA	ACATGCAAGAACTGTTTCAGTC
OsDUF50604	LOC_Os03g06680	AGGTGGAGCGTGGACTCAAT	TGCATCCAGCCCAAGATGAC
OsDUF50605	LOC_Os03g58230	TTTTGGTTTTAGCATTAGGGGC	TTCCATGGAGATTACAAGTGCT
OsDUF50606	LOC_Os05g44300	GATCGACGAAGAAACGAAGC	TTGGACAGGCTCATCTCATTG
OsDUF50607	LOC_Os07g08390	TACTAGGACGCCCTTCTTTGTT	CCACACTTCCAAACCAAGAATG
OsDUF50608	LOC_Os10g28210	TGGGGAGTGAGAAGAGTATGTA	TGGATGCTAACCTGATCTGATC
OsActin	OsActin	GGGTTCACAAGTCTGCCTATTGT	ACGGGACACGACCAAGGA

## Sheet: Table S10
Table S10 The expression data of miRNAs targeting OsDUF506s
GeneID	Shoot	Root	Leaf	Anther	Embryo	Endosperm	Control: seeding (14 days)	Drought: seeding (14 days)	Salt: seeding (14 days)	Cold: seeding (14 days)
osa-miR5837.2	-4.611	-4.393	-4.327	-1.104	-4.713	-4.498	-4.54	-4.614	-4.679	-4.684
osa-miR5832	-4.611	-4.393	-4.327	-2.689	-4.713	-4.498	-4.54	-4.614	-4.679	-4.684
osa-miR5821	-3.026	-4.393	-4.327	-2.689	-2.128	0.961	-2.54	-0.444	-1.679	-1.099
osa-miR5816	-2.611	-4.393	-4.327	-2.689	-4.713	-4.498	-4.54	-4.614	-4.679	-2.684
osa-miR5809	0.597	-0.692	-4.327	-2.689	-1.905	-4.498	-0.08	0.812	-0.357	0.673
osa-miR5078	-4.611	-4.393	-4.327	-2.689	-4.713	-4.498	-4.54	-4.614	-4.679	-4.684
osa-miR444b.1	9.346	8.524	6.817	-2.689	7.734	5.844	10.43	10.533	9.078	10.249
osa-miR2919	-4.611	-4.393	-4.327	-2.689	-4.713	-4.498	-4.54	-4.614	-4.679	-4.684
osa-miR2102-5p	-4.611	-4.393	-4.327	-2.689	-4.713	0.025	-4.54	-4.614	-4.679	-4.684
osa-miR1875	-0.911	-4.393	-4.327	0.48	-4.713	-2.176	0.103	0.243	0.678	-0.16
osa-miR1874-3p	3.01	1.715	-0.867	1.558	4.723	13.109	-0.452	1.268	-0.978	-0.596
osa-miR1846d-3p	1.002	1.033	-2.742	-2.689	-1.905	3.078	-1.081	0.743	-0.772	-0.16
osa-miR1846a-5p	5.065	2.973	-0.867	0.48	2.384	3.562	1.241	1.316	2.957	0.87
osa-miR171d-5p	-3.026	-4.393	-2.005	-2.689	-4.713	-4.498	-2.218	-2.292	-3.679	-1.514
osa-miR167e-3p	0.143	-2.808	-0.239	0.895	-3.713	-2.176	3.847	4.127	3.069	2.791
osa-miR162b	3.024	3.007	3.597	-1.104	2.132	-2.176	4.479	4.277	3.909	3.851
osa-miR156j-3p	6.74	5.546	1.196	-2.689	4.806	3.936	5.755	6.619	5.384	5.994
osa-miR1427	5.055	3.495	0.531	-2.689	3.379	3.696	4.941	6.083	3.656	3.738
osa-miR5340	-3.026	-4.393	-4.327	-2.689	-4.713	-4.498	-4.54	-3.029	-4.679	-4.684
osa-miR531b	7.594	6.476	1.505	-2.689	5.625	4.005	-1.37	-0.09	-1.509	1.148
osa-miR531a	5.658	3.731	0.531	-2.689	3.674	1.545	-2.955	-2.292	-3.095	-1.224
osa-miR2926	-4.611	-4.393	-4.327	-2.689	-4.713	-4.498	-4.54	-4.614	-4.679	-4.684
osa-miR2924	-4.611	-4.393	-4.327	-2.689	-4.713	-4.498	-4.54	-4.614	-4.679	-4.684
osa-miR2880	1.496	-0.001	4.111	-2.689	-0.806	0.256	4.612	4.843	4.092	4.427
osa-miR2864.1	3.081	1.796	-1.52	-2.689	-0.806	0.359	1.132	0.94	0.53	0.807
osa-miR168b	-4.611	-4.393	-4.327	-2.689	-4.713	-4.498	-4.54	-4.614	-4.679	-4.684
osa-miR160f-3p	3.116	-2.07	-2.742	-2.689	-2.391	-2.496	0.669	0.141	-0.978	0.601
osa-miR815a	3.277	1.873	-4.327	-0.367	3.691	1.116	1.763	2.154	1.387	1.791
osa-miR5833	0.246	-0.393	-2.742	-2.689	-3.128	-3.498	-3.54	-2.614	-3.095	-3.684
osa-miR2925	-4.611	-4.393	-4.327	-2.689	-4.713	-4.498	-4.54	-4.614	-4.679	-4.684
osa-miR1848	4.575	4.078	-0.079	-2.689	3.421	3.327	-2.218	0.595	0.075	0.871
osa-miR5075	-4.611	-4.393	-4.327	-2.689	-4.714	-4.498	-4.54	-4.614	-4.679	-4.684
osa-miR2927	-4.611	-4.393	-4.327	-2.689	-4.713	-4.498	-4.54	-4.614	-4.679	-4.684
osa-miR2094-3p	-4.611	-4.393	-4.327	-2.689	-3.128	-4.498	-2.955	-4.614	-4.679	-4.684
osa-miR6249a	-2.611	-2.808	-4.327	-2.689	-3.713	-2.913	-2.54	-1.614	-4.679	-3.684

[truncated: 1 more sheets: Table S11]
