# Supplementary material for: Genome-wide identification of DUF506 gene family in Oryza sativa and expression profiling under abiotic stresses
Source: PeerJ. 2023 Sep 29;11:e16168. doi: 10.7717/peerj.16168 (PMC10544316; doi:10.7717/peerj.16168)
Supplement: Supplemental Information 2 [file peerj-11-16168-s002.xlsx]

## Sheet: Table S1
Table S1 The ID information of DUF506 genes in 10 plant species
	Species	Gene	Subfamily
Dicots	Arabidopsis thaliana	AT1G12030	I
		AT1G62420	I
		AT3G07350	I
		AT3G25240	I
		AT2G20670	II
		AT4G32480	II
		AT1G77145	IIIa
		AT1G77160	IIIa
		AT2G39650	IIIa
		AT2G38820	IIIb
		AT3G22970	IIIb
		AT3G54550	IIIb
		AT4G14620	IIIb
	Glycine max	KRH07392	I
		KRH11519	I
		KRH36535	I
		KRH46613	I
		KRH51155	I
		KRH10888	II
		KRH20449	II
		KRH21430	II
		KRH25596	II
		KRH25597	II
		KRH27801	II
		KRH50053	II
		KRH77753	II
		KRH01670	IIIa
		KRH70457	IIIa
		KRG92439	IIIb
		KRG95604	IIIb
		KRG95605	IIIb
		KRG95606	IIIb
		KRH31637	IIIb
		KRH32089	IIIb
		KRH34359	IIIb
		KRH69065	IIIb
		KRH71350	IIIb
		KRH71351	IIIb
	Solanum tuberosum	PGSC0003DMT400008686	I
		PGSC0003DMT400051812	I
		PGSC0003DMT400053173	I
		PGSC0003DMT400033381	II
		PGSC0003DMT400045914	II
		PGSC0003DMT400047228	II
		PGSC0003DMT400076440	II
		PGSC0003DMT400076441	II
		PGSC0003DMT400076442	II
		PGSC0003DMT400025041	IIIa
		PGSC0003DMT400015576	IIIb
		PGSC0003DMT400041951	IIIb
		PGSC0003DMT400049773	IIIb
	Gossypium raimondii	KJB08778	I
		KJB42568	I
		KJB68564	I
		KJB69193	I
		KJB84051	I
		KJB34862	II
		KJB34863	II
		KJB50110	II
		KJB68642	II
		KJB69527	II
		KJB81246	II
		KJB73924	IIIa
		KJB75241	IIIa
		KJB75242	IIIa
		KJB76091	IIIa
		KJB11130	IIIb
		KJB22953	IIIb
		KJB22954	IIIb
		KJB25958	IIIb
		KJB38255	IIIb
Monocots	Oryza sativa	LOC_Os01g68650	I
		LOC_Os11g25020	I
		LOC_Os11g25040	I
		LOC_Os01g54340	II
		LOC_Os05g44300	II
		LOC_Os01g74250	IIIa
		LOC_Os03g06680	IIIb
		LOC_Os03g58230	IIIb
		LOC_Os07g08390	IIIb
		LOC_Os10g28210	IIIb
	Zea mays	Zm00001eb143540	I
		Zm00001eb153020	II
		Zm00001eb139770	IIIa
		Zm00001eb004750	IIIb
		Zm00001eb047990	IIIb
		Zm00001eb060780	IIIb
		Zm00001eb116880	IIIb
		Zm00001eb301450	IIIb
	Hordeum vulgare	HORVU.MOREX.r3.1HG0077120	II
		HORVU.MOREX.r3.3HG0288470	II
		HORVU.MOREX.r3.3HG0307620	IIIa
		HORVU.MOREX.r3.3HG0329430	IIIa
	Triticum aestivum	TraesCS3B02G456400	I
		TraesCS4A02G116900	I
		TraesCS4B02G187500	I
		TraesCS4D02G188800	I
		TraesCS1A02G339700	II
		TraesCS1B02G352000	II
		TraesCS1D02G341700	II
		TraesCS3A02G274100	II
		TraesCS3B02G307800	II
		TraesCS3D02G273300	II
		TraesCS3A02G409700	IIIa
		TraesCS3A02G530700	IIIa
		TraesCS3B02G442800	IIIa
		TraesCS3B02G600900	IIIa
		TraesCS3D02G404300	IIIa
		TraesCS3D02G536200	IIIa
		TraesCS4A02G025500	IIIb
		TraesCS4B02G278500	IIIb
		TraesCS4D02G277000	IIIb
		TraesCS5A02G439200	IIIb
		TraesCS5B02G442200	IIIb
		TraesCS5D02G446400	IIIb
	Sorghum bicolor	EES04096	I
		EES01469	II
		EES19824	II
		EER91615	IIIb
		EER93295	IIIb
		EER95459	IIIb
		EER98072	IIIb
		OQU88571	IIIb
	Ananas comosus	Aco003129	I
		Aco021417	I
		Aco005614	II
		Aco006009	II
		Aco016807	IIIa
		Aco004226	IIIb
		Aco008831	IIIb
