# Supplementary material for: Genome-wide identification of DUF506 gene family in Oryza sativa and expression profiling under abiotic stresses
Source: PeerJ. 2023 Sep 29;11:e16168. doi: 10.7717/peerj.16168 (PMC10544316; doi:10.7717/peerj.16168)
Supplement: Supplemental Information 3 [file peerj-11-16168-s003.xlsx]

## Sheet: Table S2
Table S2 The Number of Cis-Acting Elements identified in OsDUF506s
functional categories	Cis-Acting Elements	OsDUF50601	OsDUF50602	OsDUF50603	OsDUF50604	OsDUF50605	OsDUF50606	OsDUF50607	OsDUF50608	OsDUF50609	OsDUF50610	Total
Hormone response	MeJA-responsiveness	4	6	2	16	4	2	8	6	4	6	58
	abscisic acid responsiveness	7	7	2	5	4	13	6	5		6	55
	auxin responsiveness		1	3				1	1	1		7
	salicylic acid responsiveness	1			2					4		7
	gibberellin responsiveness	2			1			1		1	1	6
abiotic stress response	light responsiveness	14	16	9	10	14	18	11	11	2	10	115
	anaerobic induction			2	2	6	1	3	3	2	2	21
	anoxic specific inducibility		4	1			1	1	2	2		11
	low-temperature responsiveness	1			1	1	1		1			5
	drought inducibility	1	1					1		1		4
	defense and stress responsiveness	2	1									3
plant growth and metabolism	MYBHv1 binding site	2		1	2	2	1	1				9
	meristem expression	1	1		2		1			1		6
	circadian control					1	1			1	1	4
	root specific	1				1	1					3
	zein metabolism regulation					2				1		3
	cell cycle regulation		1	1								2
	endosperm expression									1		1
	Flavonoid biosynthetic genes regulation					1						1
	Total	36	38	21	41	36	40	33	29	21	26	321
