# Supplementary material for: Genome-wide identification of DUF506 gene family in Oryza sativa and expression profiling under abiotic stresses
Source: PeerJ. 2023 Sep 29;11:e16168. doi: 10.7717/peerj.16168 (PMC10544316; doi:10.7717/peerj.16168)
Supplement: Supplemental Information 4 [file peerj-11-16168-s004.xlsx]

## Sheet: Table S3
Table S3 SNP-index values of OsDUF506s non-synonymous SNPs in 9 subpopulations
Subfamily	Gene ID	nsSNP ID	ind1A			ind1B			ind2			ind3			indx			japx			subtrop			temp			trop
			SNPGJ-index	SNPXI-index	SNPH-index	SNPGJ-index	SNPXI-index	SNPH-index	SNPGJ-index	SNPXI-index	SNPH-index	SNPGJ-index	SNPXI-index	SNPH-index	SNPGJ-index	SNPXI-index	SNPH-index	SNPGJ-index	SNPXI-index	SNPH-index	SNPGJ-index	SNPXI-index	SNPH-index	SNPGJ-index	SNPXI-index	SNPH-index	SNPGJ-index	SNPXI-index	SNPH-index
I	OSDUF50602	OSDUF50602.1	1.06383	98.9362	0	2.54777	97.4522	0	3.67647	95.9559	0.367647	24.0535	73.9421	2.00445	13.5397	82.7853	3.67505	87.6712	10.9589	1.36986	85.8491	14.1509	0	99.2095	0.395257	0.395257	97.7077	1.7192	0.573066
	OsDUF50609	OsDUF50609.1	1.94175	96.6019	1.45631	0	99.5025	0.497512	0.714286	98.5714	0.714286	0.431034	98.9224	0.646552	2.01342	95.8054	2.18121	88.75	6.25	5	100	0	0	97.8723	1.77305	0.35461	95.5801	3.8674	0.552486
		OsDUF50609.2	100	0	0	100	0	0	100	0	0	100	0	0	100	0	0	70.7317	25.6098	3.65854	100	0	0	84.5614	15.4386	0	99.729	0.271003	0
		OsDUF50609.3	98.5646	1.43541	0	100	0	0	99.6479	0.352113	0	99.7895	0.210526	0	98.8525	1.14754	0	97.561	2.43902	0	99.1071	0.892857	0	99.3007	0.699301	0	100	0	0
		OsDUF50609.4	98.5577	1.44231	0	100	0	0	99.6479	0.352113	0	99.789	0.21097	0	98.5246	1.31148	0.163934	97.5309	2.46914	0	99.0991	0.900901	0	99.2982	0.701754	0	99.4609	0.539084	0
		OsDUF50609.5	98.5646	1.43541	0	100	0	0	99.6479	0.352113	0	99.7886	0.211416	0	98.8562	1.14379	0	97.5904	2.40964	0	99.0991	0.900901	0	99.3031	0.696864	0	100	0	0
		OsDUF50609.6	0.985646	99.0144	0	1	99	0	0.996491	99.0035	0	0.997886	99.0021	0	0.988543	99.0115	0	0.975904	99.0241	0	0.990991	99.009	0	0.993007	99.007	0	1	99	0
		OsDUF50609.7	0.497512	99.005	0.497512	0	99.4975	0.502513	0.353357	98.9399	0.706714	0.21645	99.3506	0.4329	0.668896	97.6589	1.67224	85.5422	10.8434	3.61446	99.0826	0.917431	0	97.491	2.50896	0	94.5055	4.3956	1.0989
		OsDUF50609.8	98.5437	1.45631	0	100	0	0	99.6466	0.353357	0	99.7868	0.21322	0	98.8353	1.16473	0	97.561	2.43902	0	99.0826	0.917431	0	99.2908	0.70922	0	100	0	0
		OsDUF50609.9	79.7872	18.617	1.59574	99.3865	0.613497	0	40.3636	58.5455	1.09091	92.0177	7.5388	0.443459	83.0855	15.0558	1.85874	96.0526	3.94737	0	100	0	0	100	0	0	98.8406	0.869565	0.289855
		OsDUF50609.10	100	0	0	99.2308	0.769231	0	100	0	0	85.3147	14.2191	0.4662	99.3852	0.614754	0	100	0	0	100	0	0	100	0	0	99.6894	0	0.310559
		OsDUF50609.11	99.3789	0.621118	0	100	0	0	99.6154	0.384615	0	99.7685	0.231481	0	99.3492	0.650759	0	100	0	0	100	0	0	100	0	0	100	0	0
		OsDUF50609.12	98.5149	1.48515	0	100	0	0	99.6403	0.359712	0	99.7817	0.218341	0	98.4642	1.36519	0.170648	97.4684	2.53165	0	99.0566	0.943396	0	99.639	0.361011	0	99.4413	0.558659	0
		OsDUF50609.13	99.5146	0.485437	0	100	0	0	99.6454	0.35461	0	99.7881	0.211864	0	99.3443	0.491803	0.163934	100	0	0	100	0	0	100	0	0	99.455	0.544959	0
	OsDUF50610	OsDUF50610.1	100	0	0	99.0196	0.490196	0.490196	100	0	0	83.9323	15.4334	0.634249	99.5074	0.492611	0	100	0	0	100	0	0	100	0	0	99.7312	0	0.268817
		OsDUF50610.2	100	0	0	100	0	0	100	0	0	100	0	0	100	0	0	91.5663	8.43373	0	100	0	0	99.3007	0.699301	0	90.8602	8.60215	0.537634
		OsDUF50610.3	98.5577	1.44231	0	100	0	0	99.6491	0.350877	0	99.7895	0.210526	0	98.5294	1.14379	0.326797	97.5904	2.40964	0	99.1071	0.892857	0	99.3031	0.696864	0	99.4609	0.539084	0
		OsDUF50610.4	98.5646	1.43541	0	100	0	0	99.6479	0.352113	0	99.789	0.21097	0	98.3713	1.14007	0.488599	97.5904	2.40964	0	99.1071	0.892857	0	99.3007	0.699301	0	99.4624	0.537634	0
		OsDUF50610.5	91.2195	8.29268	0.487805	95.098	4.41176	0.490196	100	0	0	100	0	0	93.4747	5.54649	0.978793	97.561	1.21951	1.21951	100	0	0	98.2578	1.39373	0.348432	99.1892	0.810811	0
		OsDUF50610.6	0.480769	98.5577	0.961538	0	100	0	0.353357	98.9399	0.706714	0.212766	99.1489	0.638298	0.662252	97.351	1.98675	85.1852	9.87654	4.93827	99.0991	0.900901	0	96.7509	2.88809	0.361011	95.0549	4.3956	0.549451
II	OsDUF50606	OsDUF50606.1	100	0	0	80.8081	17.6768	1.51515	99.6466	0.353357	0	99.7877	0	0.212314	95.6882	3.48259	0.829187	67.0886	30.3797	2.53165	94.6429	5.35714	0	90.7473	8.8968	0.355872	21.1699	75.4875	3.34262
	OSDUF50601	OSDUF50601.1	100	0	0	99.5122	0.487805	0	99.2958	0.352113	0.352113	100	0	0	100	0	0	100	0	0	100	0	0	100	0	0	100	0	0
IIIa	OSDUF50603	OSDUF50603.1	99.5146	0.485437	0	24.7525	72.2772	2.9703	83.5714	15.7143	0.714286	79.4492	19.2797	1.27119	74.0132	22.8618	3.125	95.122	2.43902	2.43902	100	0	0	98.5816	0.70922	0.70922	97.019	2.71003	0.271003
		OSDUF50603.2	4.85437	92.233	2.91262	75.9804	22.0588	1.96078	70.1068	27.4021	2.4911	35.8051	61.4407	2.75424	45.2303	50.1645	4.60526	96.3855	0	3.61446	100	0	0	99.6429	0.357143	0	99.1935	0.268817	0.537634
IIIb	OsDUF50608	OsDUF50608.1	100	0	0	100	0	0	100	0	0	100	0	0	100	0	0	97.5904	1.20482	1.20482	100	0	0	100	0	0	90.137	9.58904	0.273973
		OsDUF50608.2	30.102	67.8571	2.04082	3.04569	94.4162	2.53807	10.4089	88.8476	0.743494	0	98.6547	1.34529	6.1082	90.7504	3.14136	96.3415	1.21951	2.43902	99.1071	0.892857	0	99.2908	0.35461	0.35461	98.9071	0.819672	0.273224
		OsDUF50608.3	70.6731	28.8462	0.480769	98.5294	1.47059	0	89.3617	10.6383	0	100	0	0	94.599	4.41899	0.981997	97.5904	1.20482	1.20482	100	0	0	100	0	0	99.7305	0	0.269542
	OsDUF50604	OsDUF50604.1	99.5192	0	0.480769	100	0	0	100	0	0	100	0	0	100	0	0	98.7805	1.21951	0	100	0	0	99.6503	0.34965	0	88.172	11.2903	0.537634
	OsDUF50607	OsDUF50607.1	0.578035	94.7977	4.62428	1.98675	97.351	0.662252	3.25203	93.9024	2.84553	0.25974	97.6623	2.07792	3.9501	93.5551	2.4948	97.5309	1.23457	1.23457	100	0	0	100	0	0	99.446	0.277008	0.277008
	OsDUF50605	OsDUF50605.1	99.5215	0	0.478469	99.0244	0.97561	0	96.4664	3.18021	0.353357	100	0	0	98.3713	1.14007	0.488599	100	0	0	100	0	0	100	0	0	99.7312	0	0.268817
