# Supplementary material for: Genome-wide identification of DUF506 gene family in Oryza sativa and expression profiling under abiotic stresses
Source: PeerJ. 2023 Sep 29;11:e16168. doi: 10.7717/peerj.16168 (PMC10544316; doi:10.7717/peerj.16168)
Supplement: Supplemental Information 5 [file peerj-11-16168-s005.xlsx]

## Sheet: Table S4
Table S4 The Ka/Ks ratios in duplicated gene pairs identified in OsDUF506s
No.	Sequence	Duplication Type	Ka	Ks	Ka/Ks	Date (Millions of Years Ago)	Type of Selection
1	OsDUF50609/OsDUF50610	Tandem	0.499917	1.06819	0.468005	58.6916	Purifying
2	OsDUF50601/OsDUF50606	Segmental	0.172234	0.372662	0.462171	20.476	Purifying
3	OsDUF50604/OsDUF50608	Segmental	0.13816	0.506012	0.273037	27.8028	Purifying
4	OsDUF50605/OsDUF50607	Segmental	0.230249	0.463602	0.496652	25.4727	Purifying
