# Supplementary material for: Genome-wide identification of DUF506 gene family in Oryza sativa and expression profiling under abiotic stresses
Source: PeerJ. 2023 Sep 29;11:e16168. doi: 10.7717/peerj.16168 (PMC10544316; doi:10.7717/peerj.16168)
Supplement: Supplemental Information 6 [file peerj-11-16168-s006.xlsx]

## Sheet: Table S5
Table S5 One-to-one orthologous relationships between rice and other monocotyledonous species
Species	chromosome	Gene ID	Species	chromosome	Gene ID
Oryza sativa	3	OsDUF50605	Arabidopsis thaliana	3	AT3G22970
	3	OsDUF50604		3	AT3G22970
	3	OsDUF50604		4	AT4G14620
	7	OsDUF50607		3	AT3G22970
	7	OsDUF50607		4	AT4G14620
	10	OsDUF50608		3	AT3G22970
Oryza sativa	1	OsDUF50601	Zea mays	3	Zm00001eb153020
	1	OsDUF50602		3	Zm00001eb143540
	2	OsDUF50603		3	Zm00001eb139770
	3	OsDUF50605		1	Zm00001eb060780
	4	OsDUF50604		1	Zm00001eb004750
	5	OsDUF50605		2	Zm00001eb116880
	6	OsDUF50605		7	Zm00001eb301450
	5	OsDUF50606		3	Zm00001eb153020
	7	OsDUF50607		1	Zm00001eb060780
	8	OsDUF50607		7	Zm00001eb301450
	10	OsDUF50608		1	Zm00001eb004750
Oryza sativa	1	OsDUF50601	Hordeum vulgare	1	HORVU.MOREX.r3HG0077120
	1	OsDUF50601		3	HORVU.MOREX.r3.3HG0288470
	1	OsDUF50602		3	HORVU.MOREX.r3.3HG0309470
	1	OsDUF50603		3	HORVU.MOREX.r3.3HG0329430
	3	OsDUF50604		4	HORVU.MOREX.r3.4HG0402310
	3	OsDUF50605		5	HORVU.MOREX.r3.5HG0519200
	5	OsDUF50606		1	HORVU.MOREX.r3HG0077120
	5	OsDUF50606		3	HORVU.MOREX.r3.3HG0288470
	7	OsDUF50607		5	HORVU.MOREX.r3.5HG0519200
	10	OsDUF50608		4	HORVU.MOREX.r3.4HG0402310
Oryza sativa	1	OsDUF50601	Triticum aestivum	1A	TraesCS1A02G339700
	1	OsDUF50601		1B	TraesCS1B02G352000
	1	OsDUF50601		1D	TraesCS1D02G341700
	1	OsDUF50602		3A	TraesCS3A02G420900
	1	OsDUF50603		3A	TraesCS3A02G530700
	1	OsDUF50601		3A	TraesCS3A02G274100
	1	OsDUF50602		3B	TraesCS3B02G456400
	1	OsDUF50603		3B	TraesCS3B02G600900
	1	OsDUF50601		3B	TraesCS3B02G307800
	1	OsDUF50602		3D	TraesCS3D02G416400
	1	OsDUF50603		3D	TraesCS3D02G536200
	1	OsDUF50601		3D	TraesCS3D02G273300
	3	OsDUF50604		4A	TraesCS4A02G025500
	3	OsDUF50604		4B	TraesCS4B02G278500
	3	OsDUF50604		4D	TraesCS4D02G277000
	3	OsDUF50605		5A	TraesCS5A02G439200
	3	OsDUF50605		5B	TraesCS5B02G442200
	3	OsDUF50605		5D	TraesCS5D02G446400
	5	OsDUF50606		1A	TraesCS1A02G339700
	5	OsDUF50606		1B	TraesCS1B02G352000
	5	OsDUF50606		1D	TraesCS1D02G341700
	5	OsDUF50606		3A	TraesCS3A02G274100
	5	OsDUF50606		3B	TraesCS3B02G307800
	5	OsDUF50606		3D	TraesCS3D02G273300
	7	OsDUF50607		5A	TraesCS5A02G439200
	7	OsDUF50607		5B	TraesCS5B02G442200
	7	OsDUF50607		5D	TraesCS5D02G446400
	10	OsDUF50608		4A	TraesCS4A02G025500
	10	OsDUF50608		4B	TraesCS4B02G278500
	10	OsDUF50608		4D	TraesCS4D02G277000
Oryza sativa	1	OsDUF50601	Sorghum bicolor	3	EES01469
	1	OsDUF50602		3	EES04096
	1	OsDUF50601		9	EES19824
	3	OsDUF50604		1	EER91615
	3	OsDUF50605		1	EER93295
	3	OsDUF50604		1	EER95459
	5	OsDUF50606		3	EES01469
	5	OsDUF50606		9	EES19824
	7	OsDUF50607		1	EER93295
	10	OsDUF50608		1	EER95459
	10	OsDUF50608		1	EER91615
Oryza sativa	1	OsDUF50602	Ananas comosus	1	Aco017350.1
	1	OsDUF50603		4	Aco016807.1
	1	OsDUF50601		11	Aco005614.1
	1	OsDUF50601		16	Aco006009.1
	3	OsDUF50605		9	Aco008831.1
	3	OsDUF50604		9	Aco008831.1
	3	OsDUF50604		15	Aco004226.1
	3	OsDUF50605		15	Aco004226.1
	5	OsDUF50606		11	Aco005614.1
	5	OsDUF50606		16	Aco006009.1
	7	OsDUF50607		9	Aco008831.1
	10	OsDUF50608		15	Aco004226.1
