# Supplementary material for: Genome-wide identification of DUF506 gene family in Oryza sativa and expression profiling under abiotic stresses
Source: PeerJ. 2023 Sep 29;11:e16168. doi: 10.7717/peerj.16168 (PMC10544316; doi:10.7717/peerj.16168)
Supplement: Supplemental Information 7 [file peerj-11-16168-s007.xlsx]

## Sheet: Table S6
Table S6 The Predicted miRNAs targeting OsDUF506s
miRNA_Acc.	Target_Acc.	Expectation	miRNA_start	miRNA_end	Target_start	Target_end	Inhibition	Multiplicity
osa-miR6249a	OsDUF50602	2	1	21	826	846	Cleavage	1
osa-miR6249b	OsDUF50602	2	1	21	826	846	Cleavage	1
osa-miR2094-3p	OsDUF50609	3.5	1	22	132	153	Cleavage	1
osa-miR2927	OsDUF50608	3.5	1	23	264	286	Cleavage	1
osa-miR5075	OsDUF50607	3.5	1	21	121	141	Cleavage	1
osa-miR1848	OsDUF50602	4	1	21	547	567	Cleavage	2
osa-miR1848	OsDUF50607	4	1	21	49	69	Cleavage	1
osa-miR2925	OsDUF50602	4	1	19	787	805	Cleavage	1
osa-miR5075	OsDUF50604	4	1	21	3	23	Cleavage	2
osa-miR5833	OsDUF50610	4	1	21	573	593	Cleavage	1
osa-miR815a	OsDUF50603	4	1	21	640	660	Cleavage	1
osa-miR815b	OsDUF50603	4	1	21	640	660	Cleavage	1
osa-miR815c	OsDUF50603	4	1	21	640	660	Cleavage	1
osa-miR160f-3p	OsDUF50609	4.5	1	21	30	50	Cleavage	1
osa-miR168b	OsDUF50601	4.5	1	21	161	181	Cleavage	1
osa-miR2864.1	OsDUF50602	4.5	1	21	170	190	Cleavage	1
osa-miR2864.1	OsDUF50607	4.5	1	21	467	487	Cleavage	1
osa-miR2880	OsDUF50603	4.5	1	24	903	926	Translation	1
osa-miR2924	OsDUF50608	4.5	1	21	406	425	Cleavage	1
osa-miR2925	OsDUF50605	4.5	1	19	1195	1213	Cleavage	2
osa-miR2926	OsDUF50607	4.5	1	20	505	524	Translation	1
osa-miR5075	OsDUF50604	4.5	1	21	96	116	Translation	2
osa-miR531a	OsDUF50607	4.5	1	24	46	68	Cleavage	1
osa-miR531b	OsDUF50607	4.5	1	20	50	68	Cleavage	1
osa-miR531c	OsDUF50607	4.5	1	24	46	68	Cleavage	1
osa-miR5340	OsDUF50603	4.5	1	23	534	556	Translation	1
osa-miR5833	OsDUF50603	4.5	1	21	136	156	Cleavage	1
osa-miR1427	OsDUF50602	5	1	21	29	49	Cleavage	1
osa-miR156j-3p	OsDUF50610	5	1	22	94	115	Translation	1
osa-miR162b	OsDUF50604	5	1	21	63	83	Cleavage	1
osa-miR167e-3p	OsDUF50603	5	1	21	715	735	Cleavage	1
osa-miR167i-3p	OsDUF50603	5	1	21	715	735	Cleavage	1
osa-miR171d-5p	OsDUF50606	5	1	21	34	55	Cleavage	1
osa-miR1846a-5p	OsDUF50604	5	1	21	709	729	Cleavage	1
osa-miR1846a-5p	OsDUF50608	5	1	21	694	714	Cleavage	1
osa-miR1846b-5p	OsDUF50604	5	1	21	709	729	Cleavage	1
osa-miR1846b-5p	OsDUF50608	5	1	21	694	714	Cleavage	1
osa-miR1846c-5p	OsDUF50604	5	1	21	709	729	Cleavage	1
osa-miR1846c-5p	OsDUF50608	5	1	21	694	714	Cleavage	1
osa-miR1846d-3p	OsDUF50606	5	1	20	559	578	Cleavage	1
osa-miR1848	OsDUF50602	5	1	21	472	492	Cleavage	2
osa-miR1848	OsDUF50605	5	1	21	95	114	Cleavage	1
osa-miR1848	OsDUF50606	5	1	21	280	300	Cleavage	1
osa-miR1874-3p	OsDUF50605	5	1	24	846	869	Cleavage	1
osa-miR1875	OsDUF50605	5	1	24	848	871	Translation	1
osa-miR2102-5p	OsDUF50609	5	1	20	310	329	Cleavage	1
osa-miR2919	OsDUF50603	5	1	19	748	766	Cleavage	1
osa-miR2925	OsDUF50605	5	1	19	283	301	Cleavage	2
osa-miR2925	OsDUF50608	5	1	19	1	19	Cleavage	1
osa-miR2927	OsDUF50601	5	1	23	105	127	Cleavage	1
osa-miR2927	OsDUF50604	5	1	23	270	292	Cleavage	1
osa-miR2927	OsDUF50609	5	1	23	584	606	Cleavage	1
osa-miR2927	OsDUF50605	5	1	23	956	978	Cleavage	1
osa-miR2927	OsDUF50602	5	1	23	192	214	Cleavage	1
osa-miR2927	OsDUF50606	5	1	23	114	136	Cleavage	1
osa-miR444b.1	OsDUF50606	5	1	21	541	561	Translation	1
osa-miR444c.1	OsDUF50606	5	1	21	541	561	Translation	1
osa-miR5075	OsDUF50602	5	1	21	309	329	Cleavage	1
osa-miR5075	OsDUF50610	5	1	21	678	698	Cleavage	1
osa-miR5078	OsDUF50605	5	1	21	716	736	Cleavage	1
osa-miR5340	OsDUF50610	5	1	23	495	517	Translation	1
osa-miR5809	OsDUF50603	5	1	20	27	46	Cleavage	1
osa-miR5809	OsDUF50604	5	1	20	877	896	Cleavage	1
osa-miR5809	OsDUF50606	5	1	20	112	131	Cleavage	2
osa-miR5809	OsDUF50606	5	1	20	819	838	Cleavage	2
osa-miR5816	OsDUF50602	5	1	24	106	129	Cleavage	1
osa-miR5821	OsDUF50602	5	1	21	658	678	Cleavage	1
osa-miR5832	OsDUF50601	5	1	21	114	134	Translation	1
osa-miR5837.2	OsDUF50610	5	1	21	615	635	Cleavage	1
