# Supplementary material for: Genome-wide identification of DUF506 gene family in Oryza sativa and expression profiling under abiotic stresses
Source: PeerJ. 2023 Sep 29;11:e16168. doi: 10.7717/peerj.16168 (PMC10544316; doi:10.7717/peerj.16168)
Supplement: Supplemental Information 8 [file peerj-11-16168-s008.xlsx]

## Sheet: Table S7
Table S7 The expression data of OsDUF506s in different tissues
Gene ID	Leaf blade			Leaf sheath		Root		Stem		Inflorescence		Anther		Pistil		Lemma		Palea		Ovary		Embryo		Endosperm
	vegetative	reproductive	ripening	vegetative	reproductive	vegetative	reproductive	reproductive	ripening	0.6-1.0mm	5.0-10.0mm	0.3-0.6mm	1.6-2.0mm	5-10cm	14-18cm	1.5-2.0mm	7mm	1.5-2.0mm	7mm	01 DAF	07 DAF	07 DAF	42 DAF	07 DAF	42 DAF
OsDUF50601	2.695	0.5249	-0.07466	0.9419	0.1872	0.239	0.2893	-0.1187	2.081	1.659	1.265	2.14	-0.0321	2.07	0.9599	0.7287	2.724	0.24	2.594	-1.507	-0.765	-1.402	-3.673	-0.9007	-1.538
OsDUF50602	-2.666	-4.338	-7.21	0.7576	-1.094	1.208	-0.765	-2.928	0.7329	1.178	0.6785	0.7951	1.372	1.039	0.7338	-0.9762	-0.3026	-1.141	-0.3435	-1.382	2.582	3.635	-0.1735	3.088	-1.832
OsDUF50603	0.4872	-0.7082	-0.8608	-1.153	-0.7149	-1.972	-2.19	-1.842	-1.497	-2.198	-2.163	-1.332	-1.229	-1.612	-1.887	-1.845	-1.345	-1.705	-1.454	-1.106	-1.943	-2.5	-1.43	-2.015	-0.3811
OsDUF50604	-0.6665	-0.9374	-2.851	0.3759	0.5977	0.6965	-0.0388	0.8398	2.279	1.702	2.521	1.564	3.811	1.75	2.279	1.141	1.92	0.7955	1.973	-0.2354	0.5405	-0.3855	-0.1409	0.2796	-0.9176
OsDUF50605	3.553	1.294	-0.1237	1.652	3	0.251	1.409	-0.8011	0.4521	1.189	2.035	2.245	1.97	2.182	1.817	2.188	0.5525	2.083	0.6753	-1.019	-0.543	-0.5565	0.3458	-2.295	1.635
OsDUF50606	-3.272	-3.126	-3.888	-4.695	-6.162	-5.226	-4.805	-7.692	-2.785	-5.49	-5.309	-4.986	-4.342	-7.268	-6.876	-8.658	-2.65	-8.307	-1.957	-9.057	-9.48	-9.915	-7.404	-8.04	-7.444
OsDUF50607	-2.935	-0.4138	-1.203	0.01167	2.637	1.898	2.329	-1.513	1.349	0.1393	-0.8793	0.944	1.917	0.6534	0.4736	-2.126	0.5808	-2.352	0.8423	0.3954	2.481	0.3366	-2.691	2.077	-0.6557
OsDUF50608	0.5285	1.375	0.3222	0.6157	2.702	1.45	2.226	0.5195	2.159	2.215	1.211	0.3878	0.1372	0.2535	-0.0212	-1.051	2.497	-1.274	2.403	-0.3452	-0.3045	-1.619	-1.635	-0.4268	-0.1783
OsDUF50609	NA	NA	NA	NA	NA	NA	NA	NA	NA	NA	NA	NA	NA	NA	NA	NA	NA	NA	NA	NA	NA	NA	NA	NA	NA
OsDUF50610	-8.614	-8.584	-4.722	-8.684	-3.746	-6.215	-5.755	-7.86	-9.242	-8.861	-9.338	-7.79	-8.22	-10.57	-10.49	-8.397	-9.968	-8.355	-9.613	-9.309	-9.277	-6.404	-7.228	-7.607	-6.979
Note:NA represents miss data.
