# Supplementary material for: Genome-wide identification of DUF506 gene family in Oryza sativa and expression profiling under abiotic stresses
Source: PeerJ. 2023 Sep 29;11:e16168. doi: 10.7717/peerj.16168 (PMC10544316; doi:10.7717/peerj.16168)
Supplement: Supplemental Information 9 [file peerj-11-16168-s009.xlsx]

## Sheet: Table S8
Table S8 The expression data of OsDUF506s induced by plant hormones
	root																								shoot
Hormones	ABA				GA3				IAA				JA				BL				tZ				ABA					GA3					IAA					JA					BL
GeneID	0 hr	1 hr	3 hr	6 hr	0 hr	1 hr	3 hr	6 hr	0 hr	1 hr	3 hr	6 hr	0 hr	1 hr	3 hr	6 hr	0 hr	1 hr	3 hr	6 hr	0 hr	1 hr	3 hr	6 hr	0 hr	1 hr	3 hr	6 hr	12 hr	0 hr	1 hr	3 hr	6 hr	12 hr	0 hr	1 hr	3 hr	6 hr	12 hr	0 hr	1 hr	3 hr	6 hr	12 hr	0 hr	1 hr	3 hr	6 hr	12 hr
OsDUF50601	-0.25404	0.019873	0.665	0.6178	-0.25404	-0.47242	-0.06228	0.16491	-0.25404	-0.52115	0.23743	0.081561	-0.25404	-0.027907	1.871	1	-0.25404	-0.12872	0.47847	0.18844	-0.25404	-0.63001	-0.14292	0.45789	-0.16066	0.22853	0.37235	0.94873	1.1451	-0.16066	-0.16867	-0.3039	-0.19465	-0.11866	-0.16066	-0.51181	0.26805	0.14988	-0.073663	-0.16066	1.2945	0.42155	0.47569	0.87767	-0.16066	-0.21011	0.34774	-0.10626	-0.45798
OsDUF50602	-0.031546	1.4226	2.2226	0.86239	-0.031546	-0.28853	-0.10152	0.0085252	-0.031546	-0.21721	0.17002	0.17787	-0.031546	1.6449	1.352	1.8543	-0.031546	-0.18282	0.0054004	-0.14445	-0.031546	0.48921	0.56958	0.48162	-0.060166	2.2597	3.1018	3.1143	3.4077	-0.060166	0.15226	0.0031301	0.11519	0.19648	-0.060166	-0.37418	1.407	0.24537	0.037083	-0.060166	1.5714	1.6207	1.5046	1.7435	-0.060166	-0.40151	0.11949	-0.0415	0.13645
OsDUF50603	0.2255	0.33002	0.61118	0.48561	0.2255	-0.13765	-0.086108	0.025401	0.2255	0.2854	0.08814	0.28675	0.2255	0.37784	0.88836	1.3859	0.2255	0.37335	0.30034	0.59638	0.2255	0.12245	-0.16141	-0.014542	0.14768	-0.25325	-0.42198	-0.54816	-0.43903	0.14768	0.0034354	-0.0096319	0.068978	-0.073924	0.14768	0.13187	-0.37865	-0.39354	-0.13631	0.14768	0.51625	0.095457	-0.10694	0.19907	0.14768	0.14132	0.018954	-0.10464	0.16288
OsDUF50604	0.1287	-1.1882	-2.1911	-2.0594	0.1287	-0.058893	-0.18878	0.0032192	0.1287	-1.7046	-0.92291	-0.93498	0.1287	-2.1829	-1.6328	-2.2242	0.1287	0.42356	0.51969	0.32719	0.1287	0.58946	0.7635	0.72453	0.090156	-0.11219	-0.29138	-0.15353	0.0056649	0.090156	0.24797	0.019283	0.11522	-0.14594	0.090156	0.38919	-0.48904	0.38995	0.17364	0.090156	-0.81836	-0.77777	-0.55639	-0.21308	0.090156	0.09726	0.29203	0.2644	0.092121
OsDUF50605	-0.03099	1.4288	1.3544	1.1795	-0.03099	0.29553	0.27341	0.2321	-0.03099	-0.65062	-1.0856	-0.37182	-0.03099	-3.4696	-1.9621	-2.2312	-0.03099	-0.51042	-0.46191	-0.52136	-0.03099	-0.28075	0.15898	0.84937	-0.041598	-0.66035	-0.69642	-0.39366	0.082622	-0.041598	0.077751	-0.21058	-0.14363	0.13257	-0.041598	0.0065007	0.47043	-0.090003	-0.92886	-0.041598	-0.023613	-0.99738	-0.9901	-0.74334	-0.041598	0.15506	-0.075231	0.0053026	-0.085427
OsDUF50606	0.67554	0.87409	1.8751	0.15741	0.67554	0.0049905	-0.23211	-0.0018384	0.67554	-0.51325	-0.57301	0.4423	0.67554	-1.1761	0.71199	-0.84379	0.67554	-0.10973	0.61907	0.30841	0.67554	-1.0784	-1.0988	-0.91096	-0.078082	-0.23953	0.13203	0.089937	0.44693	-0.078082	0.15111	-0.214	0.14076	0.10908	-0.078082	-0.19122	-0.034266	0.74155	-0.4457	-0.078082	0.91194	-0.48013	-1.1712	1.095	-0.078082	-0.018634	0.35318	0.28082	-0.069958
OsDUF50607	0.090799	-0.33025	-1.2571	-1.3211	0.090799	0.3215	0.21198	0.033593	0.090799	-1.4499	-1.786	-0.23636	0.090799	-3.0215	-1.1357	-2.1925	0.090799	-0.39088	-0.60339	-0.40739	0.090799	-1.3717	-1.2128	-0.98286	-0.12872	0.36504	1.4657	1.7312	1.7054	-0.12872	-0.18133	-0.17069	-0.13178	0.019582	-0.12872	0.02242	0.79002	0.58542	0.1279	-0.12872	-1.0548	0.20345	0.63066	0.60855	-0.12872	-0.096385	0.0044253	0.20367	0.36013
OsDUF50608	0.052333	-0.92741	-1.5075	-1.3672	0.052333	0.20823	0.25158	0.16622	0.052333	-0.61404	-0.48865	-0.35166	0.052333	-1.6689	-1.1208	-2.0896	0.052333	0.36085	0.31142	0.42746	0.052333	-0.39141	-0.28794	-0.3874	0.044262	-0.5508	-0.51674	-0.58499	0.092481	0.044262	0.086692	-0.14638	0.061863	-0.037357	0.044262	0.10359	-0.30719	-0.080402	-0.39606	0.044262	-1.0786	-0.97462	-0.57133	-0.10126	0.044262	-0.00065001	0.021316	-0.10666	-0.19804
OsDUF50609	NA	NA	NA	NA	NA	NA	NA	NA	NA	NA	NA	NA	NA	NA	NA	NA	NA	NA	NA	NA	NA	NA	NA	NA	NA	NA	NA	NA	NA	NA	NA	NA	NA	NA	NA	NA	NA	NA	NA	NA	NA	NA	NA	NA	NA	NA	NA	NA	NA
OsDUF50610	0.47852	-0.47836	-2.1558	-1.8563	0.47852	0.60307	0.097265	1.4787	0.47852	-0.50823	-1.1155	0.27765	0.47852	-0.57225	-0.66321	1.2564	0.47852	-0.42246	-0.14111	-0.52061	0.47852	-0.41114	-0.52598	-0.54804	-0.54837	0.046361	-1.5716	-0.0049868	-0.52308	-0.54837	-0.049636	0.41749	1.184	1.0234	-0.54837	-2.2323	0.56258	-0.78135	0.53647	-0.54837	-1.4348	-1.4675	-1.2485	-1.0914	-0.54837	-2.1378	0.28103	-1.0429	-0.026921
Note:NA represents miss data.
[truncated: 5 more columns]
