# Supplementary material for: Genome-wide identification of DUF506 gene family in Oryza sativa and expression profiling under abiotic stresses
Source: PeerJ. 2023 Sep 29;11:e16168. doi: 10.7717/peerj.16168 (PMC10544316; doi:10.7717/peerj.16168)
Supplement: Supplemental Information 10 [file peerj-11-16168-s010.xlsx]

## Sheet: Table S9
Table S9 Primer sequences of OsDUF506s
Gene ID	Gene Locus	Forward (5'-3')	Reverse (5'-3')
OsDUF50601	LOC_Os01g54340	GTGCCTCTGTGTGGTCTAGG	AGAGACAGTGACGGGTTCCT
OsDUF50602	LOC_Os01g68650	AGACTCGGCGATGAAACATCA	AGTTGAAAGGAACTCTCGCTCT
OsDUF50603	LOC_Os01g74250	GAAGCTCTTGAGATATTCGGGA	ACATGCAAGAACTGTTTCAGTC
OsDUF50604	LOC_Os03g06680	AGGTGGAGCGTGGACTCAAT	TGCATCCAGCCCAAGATGAC
OsDUF50605	LOC_Os03g58230	TTTTGGTTTTAGCATTAGGGGC	TTCCATGGAGATTACAAGTGCT
OsDUF50606	LOC_Os05g44300	GATCGACGAAGAAACGAAGC	TTGGACAGGCTCATCTCATTG
OsDUF50607	LOC_Os07g08390	TACTAGGACGCCCTTCTTTGTT	CCACACTTCCAAACCAAGAATG
OsDUF50608	LOC_Os10g28210	TGGGGAGTGAGAAGAGTATGTA	TGGATGCTAACCTGATCTGATC
OsActin	OsActin	GGGTTCACAAGTCTGCCTATTGT	ACGGGACACGACCAAGGA
