# Supplementary material for: Genome-wide identification of DUF506 gene family in Oryza sativa and expression profiling under abiotic stresses
Source: PeerJ. 2023 Sep 29;11:e16168. doi: 10.7717/peerj.16168 (PMC10544316; doi:10.7717/peerj.16168)
Supplement: Supplemental Information 11 [file peerj-11-16168-s011.xlsx]

## Sheet: Table S10
Table S10 The expression data of miRNAs targeting OsDUF506s
GeneID	Shoot	Root	Leaf	Anther	Embryo	Endosperm	Control: seeding (14 days)	Drought: seeding (14 days)	Salt: seeding (14 days)	Cold: seeding (14 days)
osa-miR5837.2	-4.611	-4.393	-4.327	-1.104	-4.713	-4.498	-4.54	-4.614	-4.679	-4.684
osa-miR5832	-4.611	-4.393	-4.327	-2.689	-4.713	-4.498	-4.54	-4.614	-4.679	-4.684
osa-miR5821	-3.026	-4.393	-4.327	-2.689	-2.128	0.961	-2.54	-0.444	-1.679	-1.099
osa-miR5816	-2.611	-4.393	-4.327	-2.689	-4.713	-4.498	-4.54	-4.614	-4.679	-2.684
osa-miR5809	0.597	-0.692	-4.327	-2.689	-1.905	-4.498	-0.08	0.812	-0.357	0.673
osa-miR5078	-4.611	-4.393	-4.327	-2.689	-4.713	-4.498	-4.54	-4.614	-4.679	-4.684
osa-miR444b.1	9.346	8.524	6.817	-2.689	7.734	5.844	10.43	10.533	9.078	10.249
osa-miR2919	-4.611	-4.393	-4.327	-2.689	-4.713	-4.498	-4.54	-4.614	-4.679	-4.684
osa-miR2102-5p	-4.611	-4.393	-4.327	-2.689	-4.713	0.025	-4.54	-4.614	-4.679	-4.684
osa-miR1875	-0.911	-4.393	-4.327	0.48	-4.713	-2.176	0.103	0.243	0.678	-0.16
osa-miR1874-3p	3.01	1.715	-0.867	1.558	4.723	13.109	-0.452	1.268	-0.978	-0.596
osa-miR1846d-3p	1.002	1.033	-2.742	-2.689	-1.905	3.078	-1.081	0.743	-0.772	-0.16
osa-miR1846a-5p	5.065	2.973	-0.867	0.48	2.384	3.562	1.241	1.316	2.957	0.87
osa-miR171d-5p	-3.026	-4.393	-2.005	-2.689	-4.713	-4.498	-2.218	-2.292	-3.679	-1.514
osa-miR167e-3p	0.143	-2.808	-0.239	0.895	-3.713	-2.176	3.847	4.127	3.069	2.791
osa-miR162b	3.024	3.007	3.597	-1.104	2.132	-2.176	4.479	4.277	3.909	3.851
osa-miR156j-3p	6.74	5.546	1.196	-2.689	4.806	3.936	5.755	6.619	5.384	5.994
osa-miR1427	5.055	3.495	0.531	-2.689	3.379	3.696	4.941	6.083	3.656	3.738
osa-miR5340	-3.026	-4.393	-4.327	-2.689	-4.713	-4.498	-4.54	-3.029	-4.679	-4.684
osa-miR531b	7.594	6.476	1.505	-2.689	5.625	4.005	-1.37	-0.09	-1.509	1.148
osa-miR531a	5.658	3.731	0.531	-2.689	3.674	1.545	-2.955	-2.292	-3.095	-1.224
osa-miR2926	-4.611	-4.393	-4.327	-2.689	-4.713	-4.498	-4.54	-4.614	-4.679	-4.684
osa-miR2924	-4.611	-4.393	-4.327	-2.689	-4.713	-4.498	-4.54	-4.614	-4.679	-4.684
osa-miR2880	1.496	-0.001	4.111	-2.689	-0.806	0.256	4.612	4.843	4.092	4.427
osa-miR2864.1	3.081	1.796	-1.52	-2.689	-0.806	0.359	1.132	0.94	0.53	0.807
osa-miR168b	-4.611	-4.393	-4.327	-2.689	-4.713	-4.498	-4.54	-4.614	-4.679	-4.684
osa-miR160f-3p	3.116	-2.07	-2.742	-2.689	-2.391	-2.496	0.669	0.141	-0.978	0.601
osa-miR815a	3.277	1.873	-4.327	-0.367	3.691	1.116	1.763	2.154	1.387	1.791
osa-miR5833	0.246	-0.393	-2.742	-2.689	-3.128	-3.498	-3.54	-2.614	-3.095	-3.684
osa-miR2925	-4.611	-4.393	-4.327	-2.689	-4.713	-4.498	-4.54	-4.614	-4.679	-4.684
osa-miR1848	4.575	4.078	-0.079	-2.689	3.421	3.327	-2.218	0.595	0.075	0.871
osa-miR5075	-4.611	-4.393	-4.327	-2.689	-4.714	-4.498	-4.54	-4.614	-4.679	-4.684
osa-miR2927	-4.611	-4.393	-4.327	-2.689	-4.713	-4.498	-4.54	-4.614	-4.679	-4.684
osa-miR2094-3p	-4.611	-4.393	-4.327	-2.689	-3.128	-4.498	-2.955	-4.614	-4.679	-4.684
osa-miR6249a	-2.611	-2.808	-4.327	-2.689	-3.713	-2.913	-2.54	-1.614	-4.679	-3.684
